# Supplementary material for: Dynamic multicolor protein labeling in living cells
Source: Royal Society of Chemistry journal article supplement (doi:10.1039/c7sc01364g), 2017-01-01

## SUPPORTING INFORMATION

### Dynamic multi-color protein labeling in living cells

Chenge Li<sup>a,b</sup>, Marie-Aude Plamont<sup>a,b</sup>, Hanna L. Sladitschek<sup>c</sup>, Vanessa Rodrigues<sup>a,b</sup>, Isabelle Aujard<sup>a,b</sup>, Pierre Neveu<sup>c</sup>, Thomas Le Saux<sup>a,b</sup>, Ludovic Jullien<sup>a,b,\*</sup> & Arnaud Gautier<sup>a,b,\*</sup>

<sup>a</sup> École Normale Supérieure, PSL Research University, UPMC Univ Paris 06, CNRS, Département de Chimie, PASTEUR, 24 rue Lhomond, 75005 Paris, France

<sup>b</sup> Sorbonne Universités, UPMC Univ Paris 06, ENS, CNRS, PASTEUR, 75005 Paris, France

<sup>c</sup> Cell Biology and Biophysics Unit, European Molecular Biology Laboratory, Meyerhofstr. 1, D-69117 Heidelberg

\* Correspondence should be addressed to: [ludovic.jullien@ens.fr](mailto:ludovic.jullien@ens.fr) and [arnaud.gautier@ens.fr](mailto:arnaud.gautier@ens.fr)

## LEGENDS OF SUPPLEMENTARY MOVIES

**Movie S1. Dynamic color switching.** Confocal time-lapse of a live HeLa cell expressing H2B-FAST labeled with 5  $\mu\text{M}$  of HBR-3,5DOM upon replacement of the medium with solution containing 5  $\mu\text{M}$  of HMBR (Single excitation at 488 nm; HMBR emission channel 493-538 nm; HBR-3,5-DOM emission channel 649-797 nm). HMBR was added at  $t = 0$  s. Cells were grown in a minifluidic channel enabling easy solution replacement. See also **Figure 3C**.

**Movie S2. Dynamic color switching in a spectrally crowded environment.** Confocal time-lapse of live HeLa cells co-expressing lyn-EGFP (membrane), MTS-mCherry (mitochondria) and H2B-FAST (nucleus) upon fluorogen exchange (Green channel Ex/Em 488/493-575 nm; Red channel Ex/Em 543/578-797 nm). Cells were initially stained with 5  $\mu\text{M}$  HBR-3,5DOM. Fluorogen exchange was induced by addition of an excess of HMBR at  $t = 0$  s. The final concentrations of HBR-3,5DOM and HMBR were respectively 0.83  $\mu\text{M}$  and 4.2  $\mu\text{M}$ . See also **Figure S4**.

## SUPPLEMENTARY FIGURES

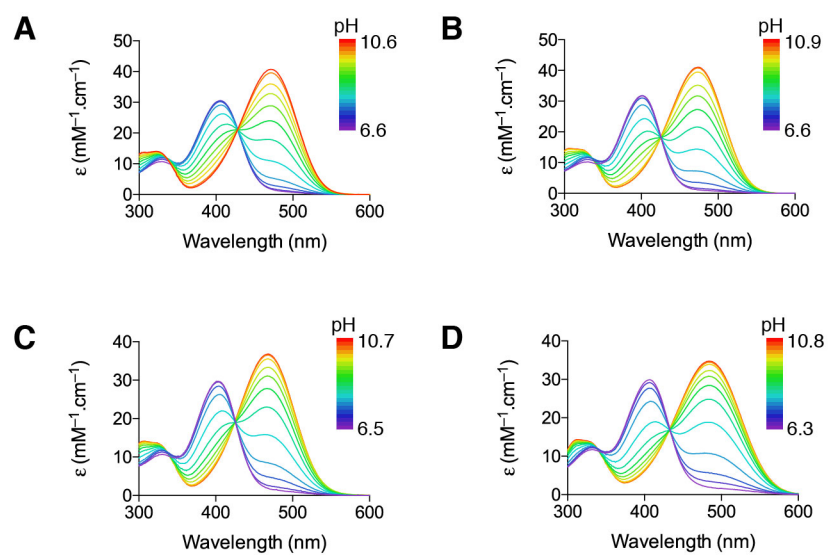

**Figure S1.** Absorption spectra of HBR-2,5DM (A), HBR-3,5DM (B), HBR-3OM (C) and HBR-3,5DOM (D) in solution in function of pH. The spectra were recorded in 0.04 M Britton–Robinson buffer (0.1 M ionic strength) at 25°C.

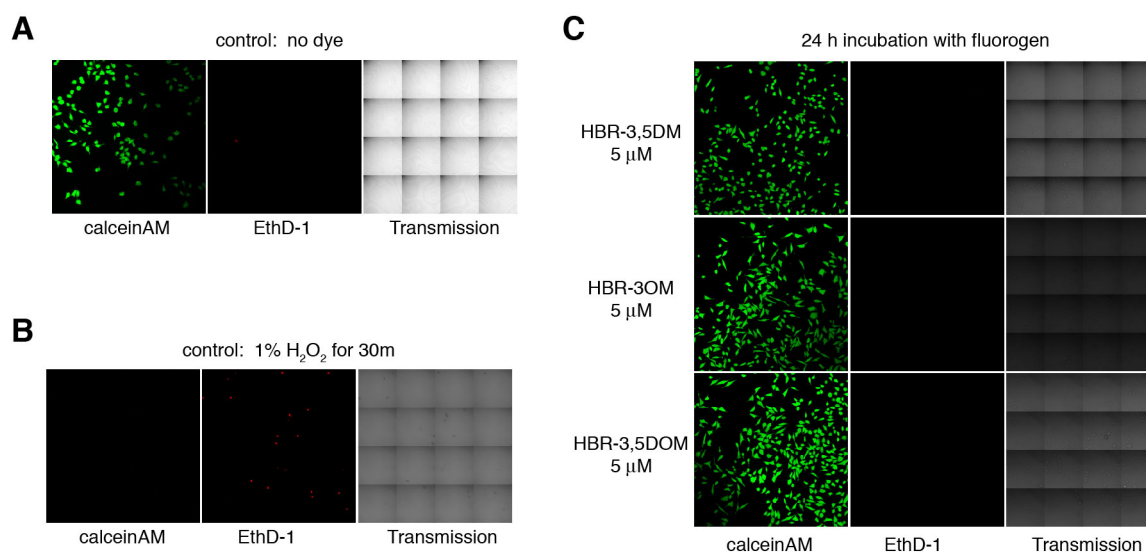

**Figure S2.** Viability assay of HeLa cells incubated for 24 h with solutions of HBR-3,5DM, HBR-3OM and HBR-3,5DOM at 5  $\mu$ M. Cell viability was tested by using calceinAM and EthD1 (LIVE/DEAD® viability/cytotoxicity assay kit). CalceinAM is a cell-permeant profluorophore cleaved by intracellular esterases releasing the green fluorescent polyanionic calcein in live cells. EthD1 (Ethidium homodimer 1) is a non cell-permeant nucleic acid red fluorescent stain that enters only cells with damaged membranes and undergoes a fluorescence enhancement upon binding to nucleic acids, thereby producing a bright red fluorescence in dead cells. Control experiments with HeLa cells non-incubated with dye (**A**) or incubated for 30 min with 1% hydrogen peroxyde (**B**) are shown. Cell fluorescence was evaluated by confocal microscopy. The experiment in (**C**) shows that HBR-3,5DM, HBR-3OM and HBR-3,5DOM are non-toxic for HeLa cells at the concentrations used for imaging.

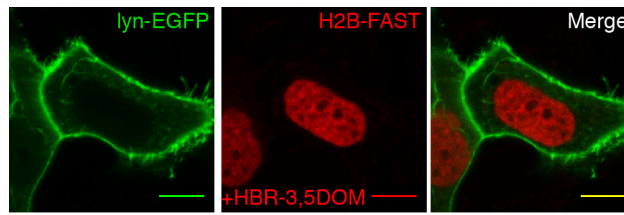

**Figure S3. Dual-color imaging with a single excitation.** Confocal micrographs of live HeLa cells co-expressing lyn-EGFP and H2B-FAST labeled with 5  $\mu$ M HBR-3,5DOM upon single excitation at 488 nm (Green emission channel 493-538 nm; Red emission channel 600-797 nm). Scale bars 10  $\mu$ m.

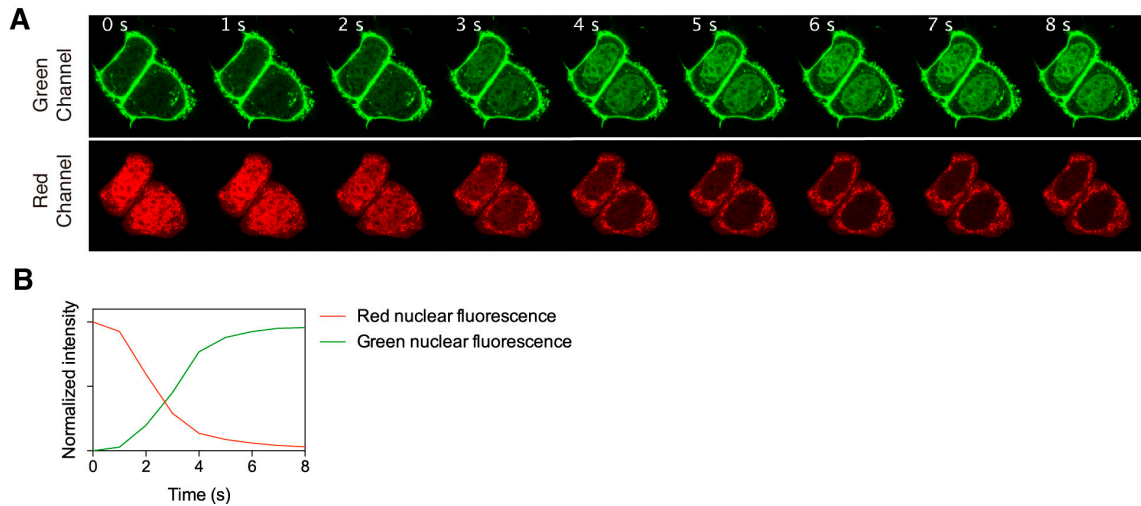

**Figure S4. Dynamic color switching in spectrally crowded environment. (A)** Time series of live HeLa cells co-expressing lyn-EGFP (membrane), MTS-mCherry (mitochondria) and H2B-FAST (nucleus) upon fluorogen exchange (Green channel Ex/Em 488/493-575 nm; Red channel Ex/Em 543/578-797 nm). Cells were initially stained with 5  $\mu$ M HBR-3,5DOM. Fluorogen exchange was induced by addition of an excess of HMBR at  $t = 0$  s. The final concentrations of HBR-3,5DOM and HMBR were respectively 0.83  $\mu$ M and 4.2  $\mu$ M. See also **Movie S2. (B)** Temporal evolution of the green and red nuclear fluorescence intensities.

## SUPPLEMENTARY TABLES

**Table S1.** Physico-chemical properties of HMBR, HBR-3,5DM, HBR-2,5DM, HBR-3OM, HBR-3,5DOM in aqueous solutions. Abbreviations are as follows :  $pK_A$ , acidity constant ;  $\lambda_{\text{abs,neutral}}$ , wavelength of maximal absorption of the protonated state;  $\lambda_{\text{abs,anionic}}$ , wavelength of maximal absorption of the anionic state.

| Fluorogen  | $pK_A$ | $\lambda_{\text{abs,neutral}}$ (nm) | $\lambda_{\text{abs,anionic}}$ (nm) |
|------------|--------|-------------------------------------|-------------------------------------|
| HMBR       | 8.7    | 401                                 | 461                                 |
| HBR-3,5DM  | 8.7    | 401                                 | 473                                 |
| HBR-2,5DM  | 8.7    | 406                                 | 472                                 |
| HBR-3OM    | 8.3    | 403                                 | 468                                 |
| HBR-3,5DOM | 8.3    | 407                                 | 484                                 |

**(Z)-5-(4-hydroxy-3-methoxybenzylidene)-2-thioxo-1,3-thiazolidin-4-one (HBR-3OM)**

<sup>1</sup>H

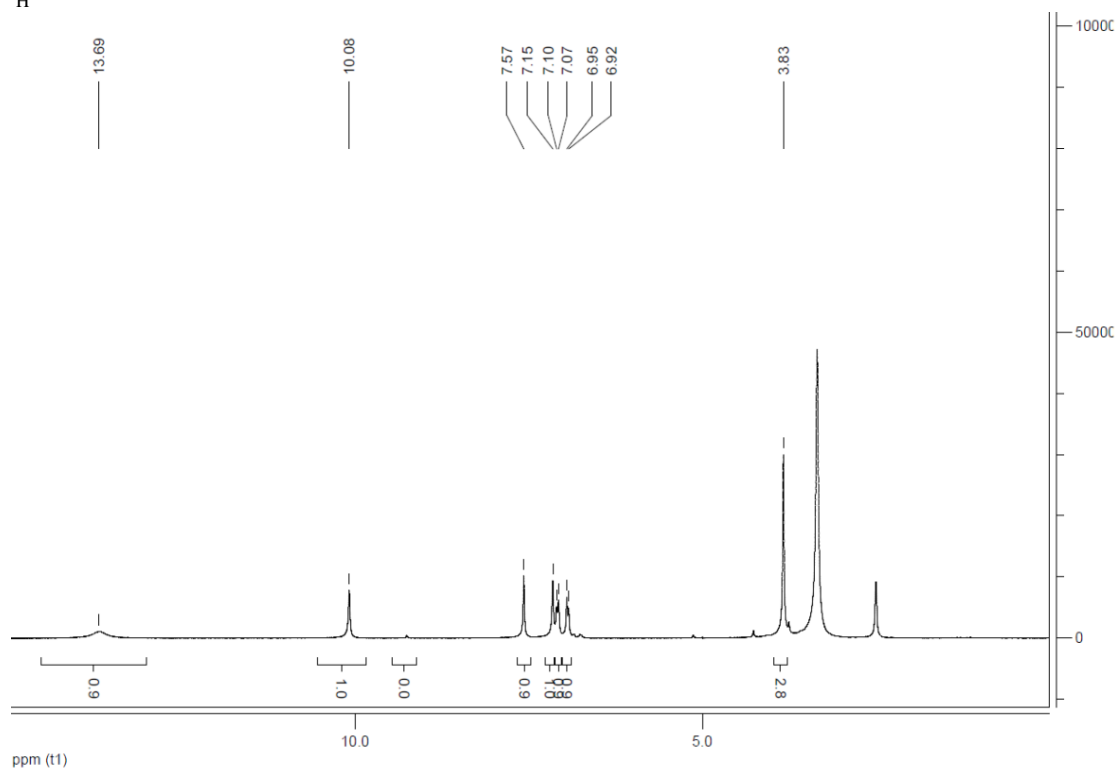

<sup>13</sup>C

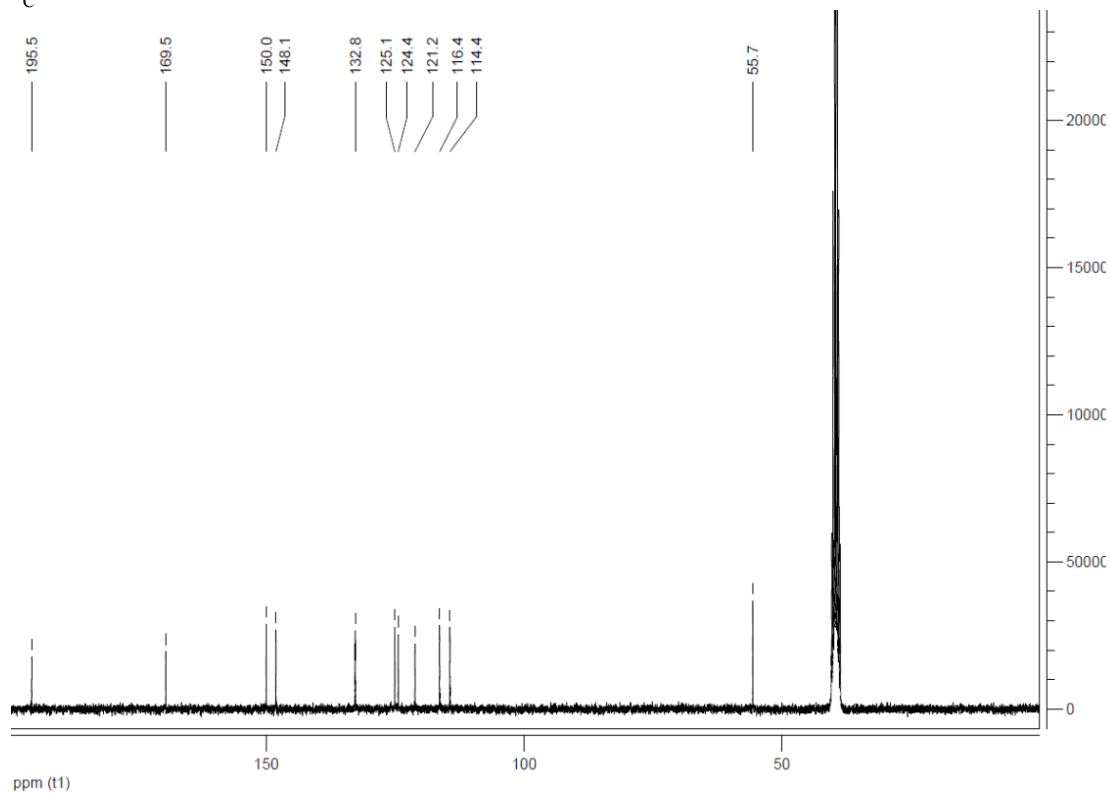



**(Z)-5-(4-hydroxy-2,5-dimethylbenzylidene)-2-thioxo-1,3-thiazolidin-4-one (HBR-2,5DM)**

<sup>1</sup>H

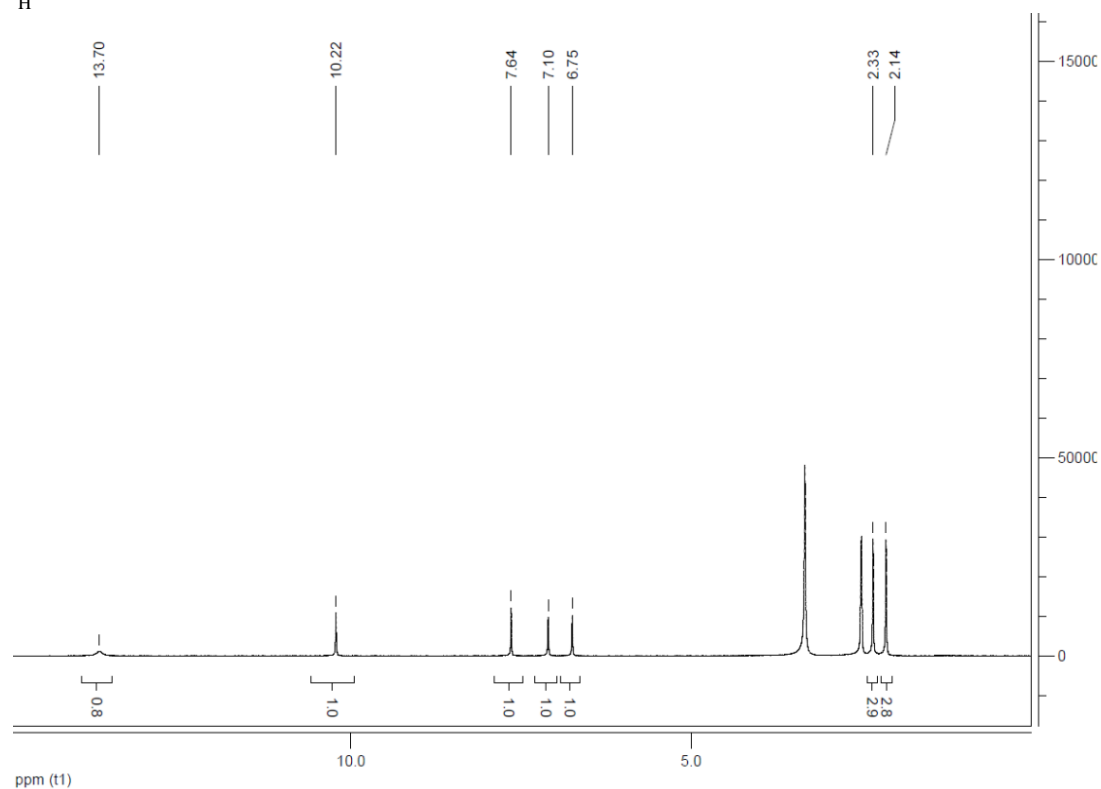

<sup>13</sup>C

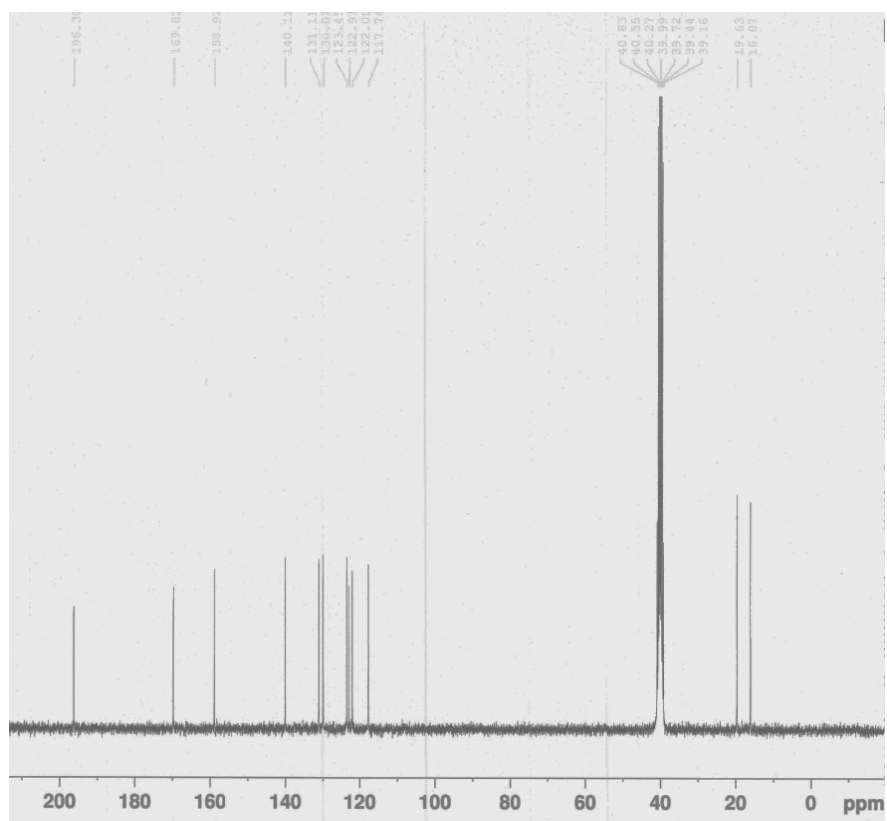

**(Z)-5-(3-ethyl-4-hydroxybenzylidene)-2-thioxothiazolidin-4-one (HBR-3E)**

<sup>1</sup>H

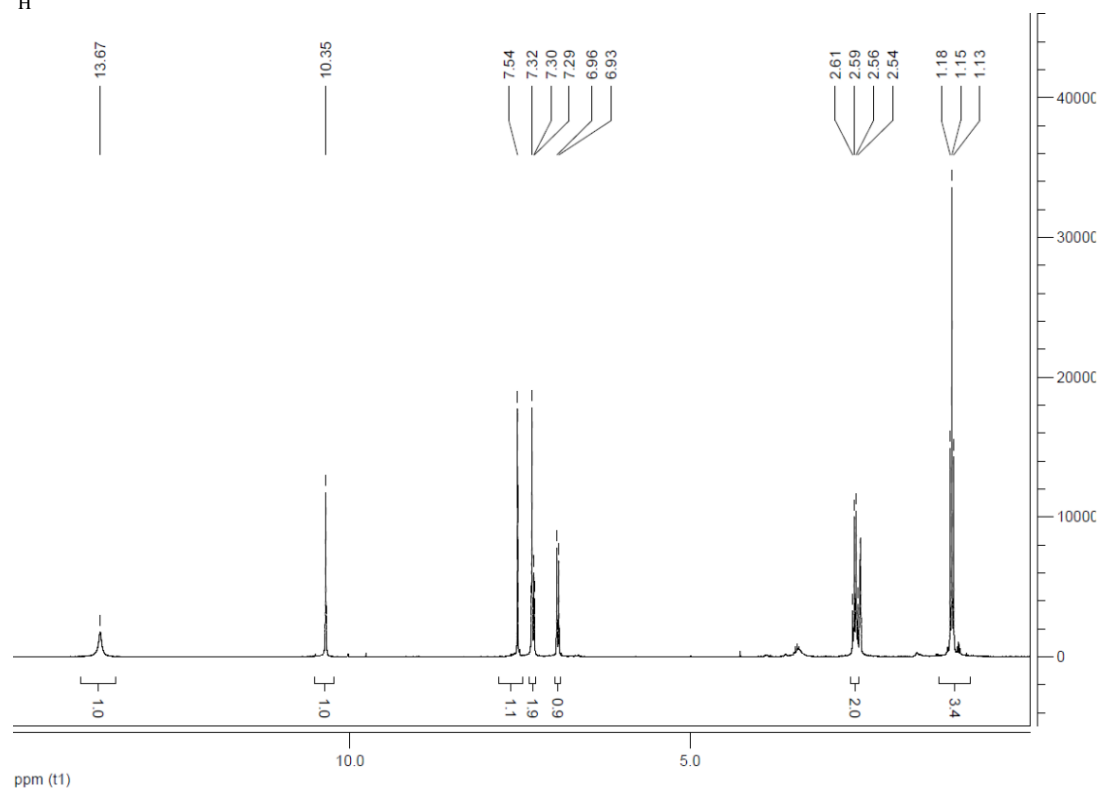

<sup>13</sup>C

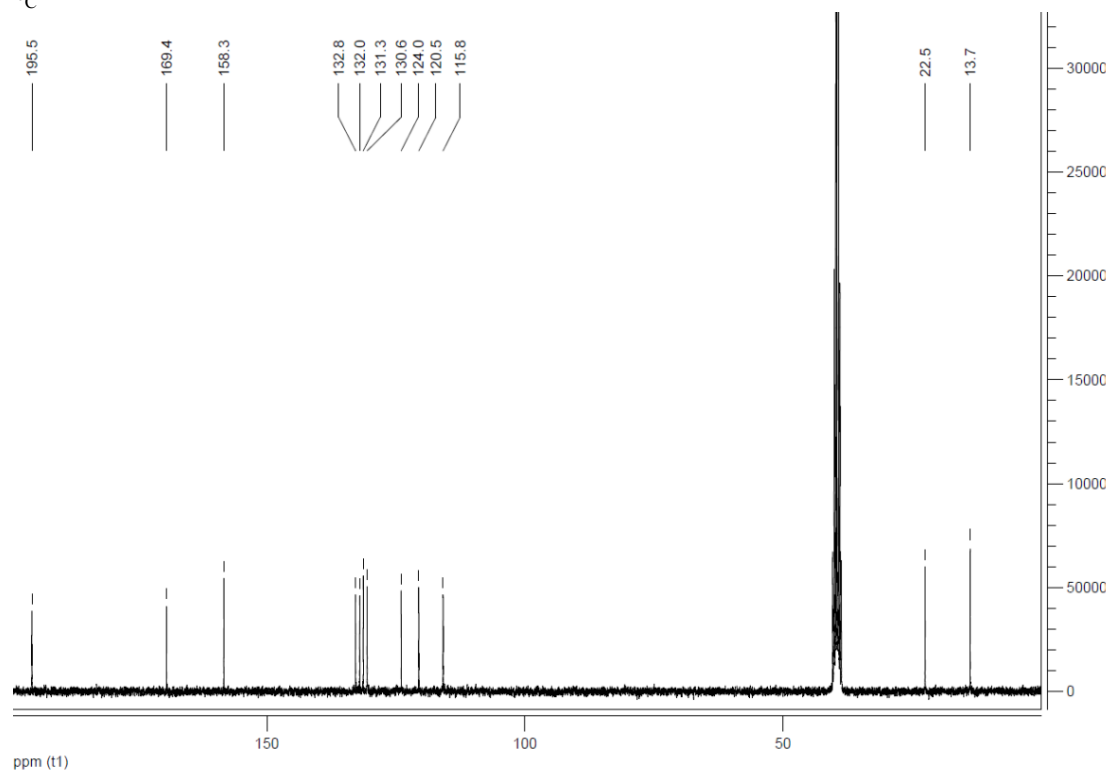

**(Z)-5-(3-ethoxy-4-hydroxybenzylidene)-2-thioxothiazolidin-4-one (HBR-3OE)**

<sup>1</sup>H

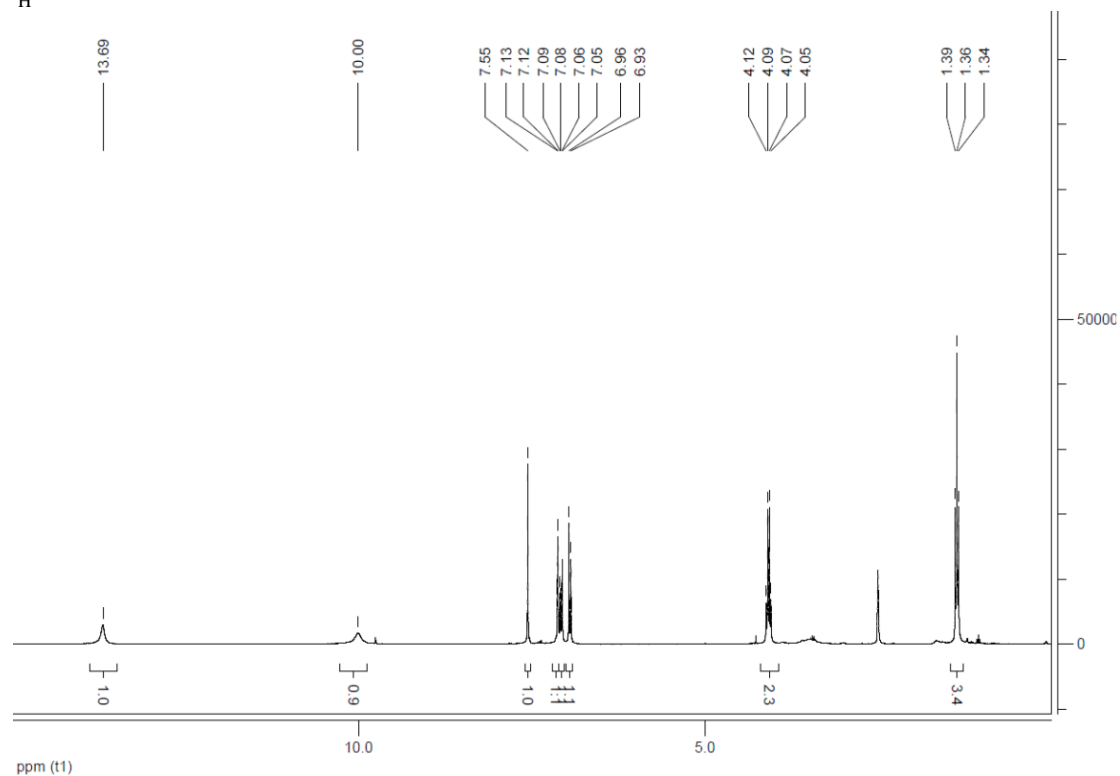

<sup>13</sup>C

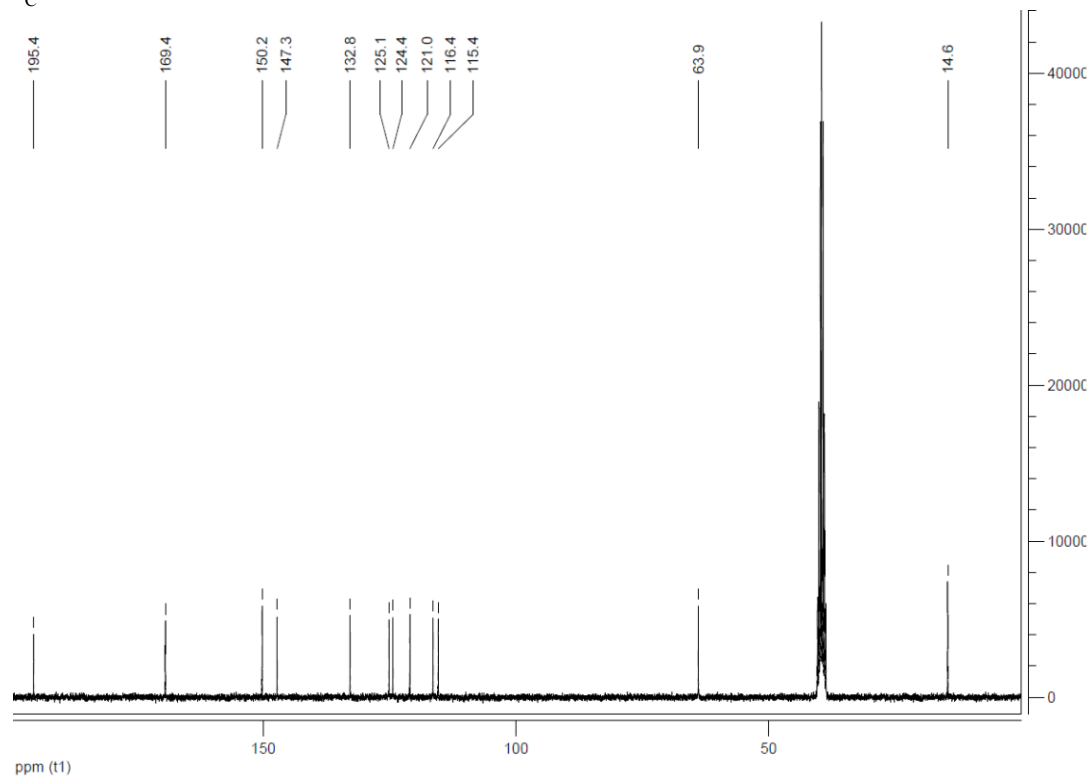

**(Z)-5-(4-hydroxy-3,5-dimethylbenzylidene)-2-thioxothiazolidin-4-one (HBR-3,5DM)**

<sup>1</sup>H

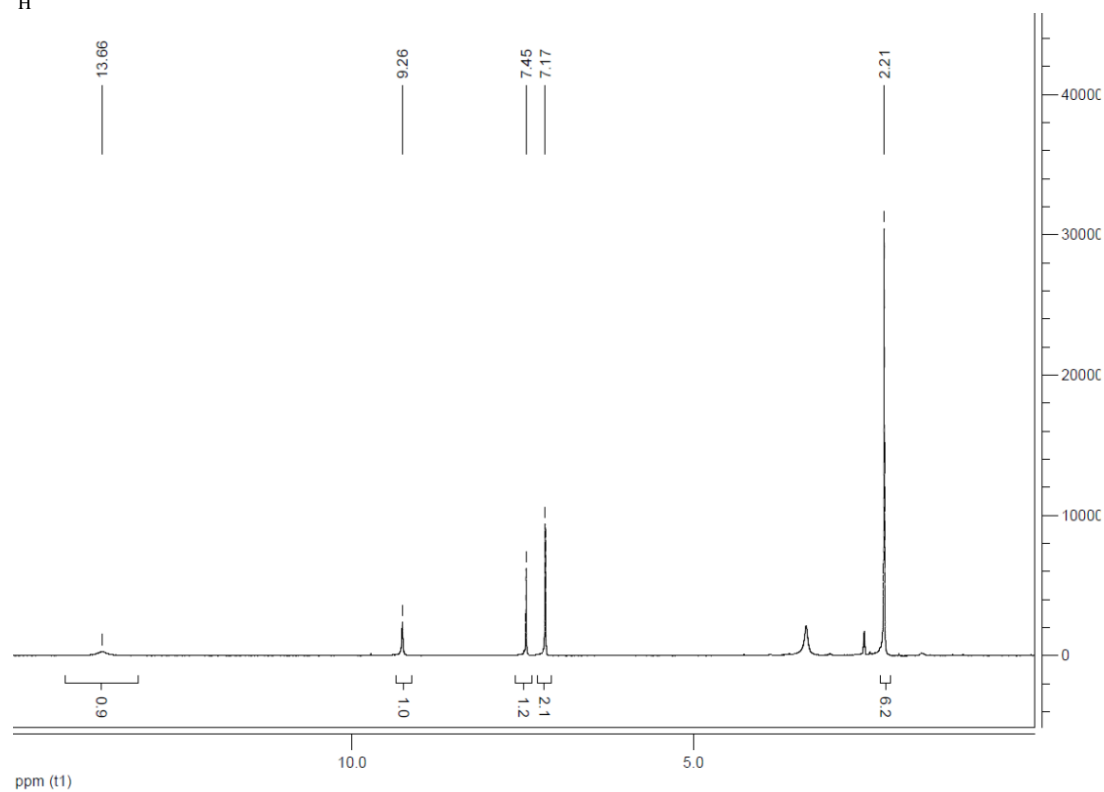

<sup>13</sup>C

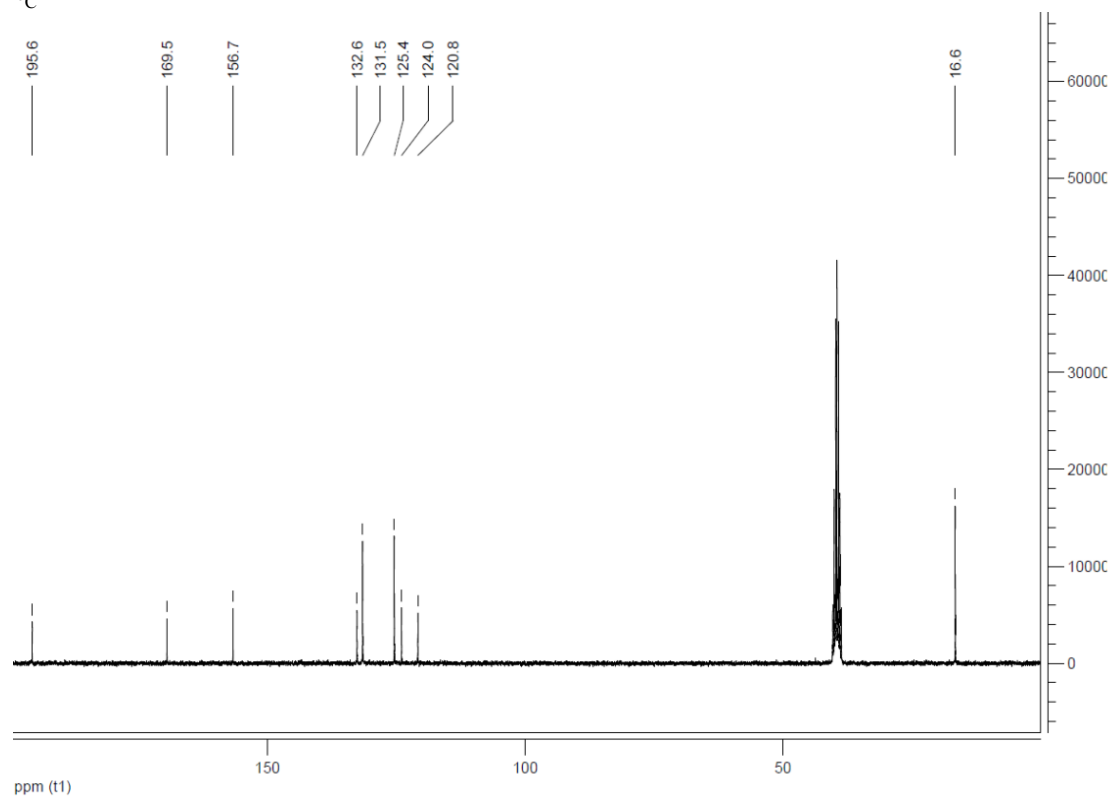

**(Z)-5-(4-hydroxy-3,5-dimethoxybenzylidene)-2-thioxothiazolidin-4-one (HBR-3,5DOM)**

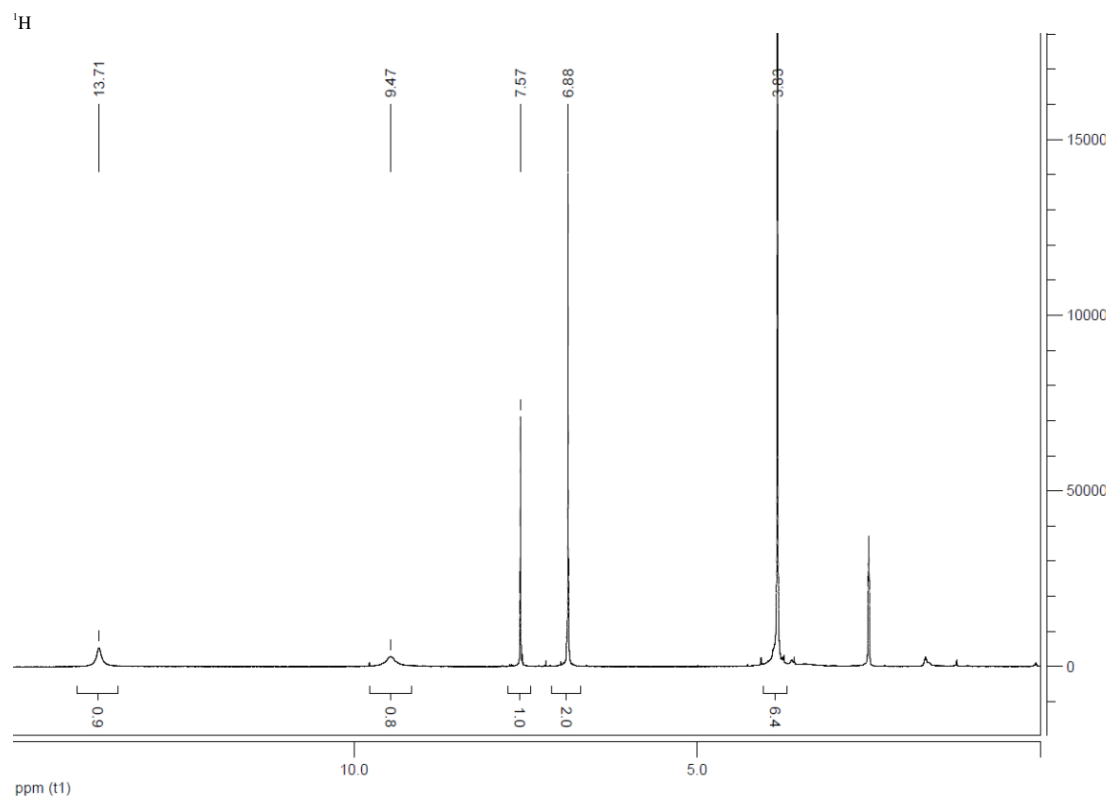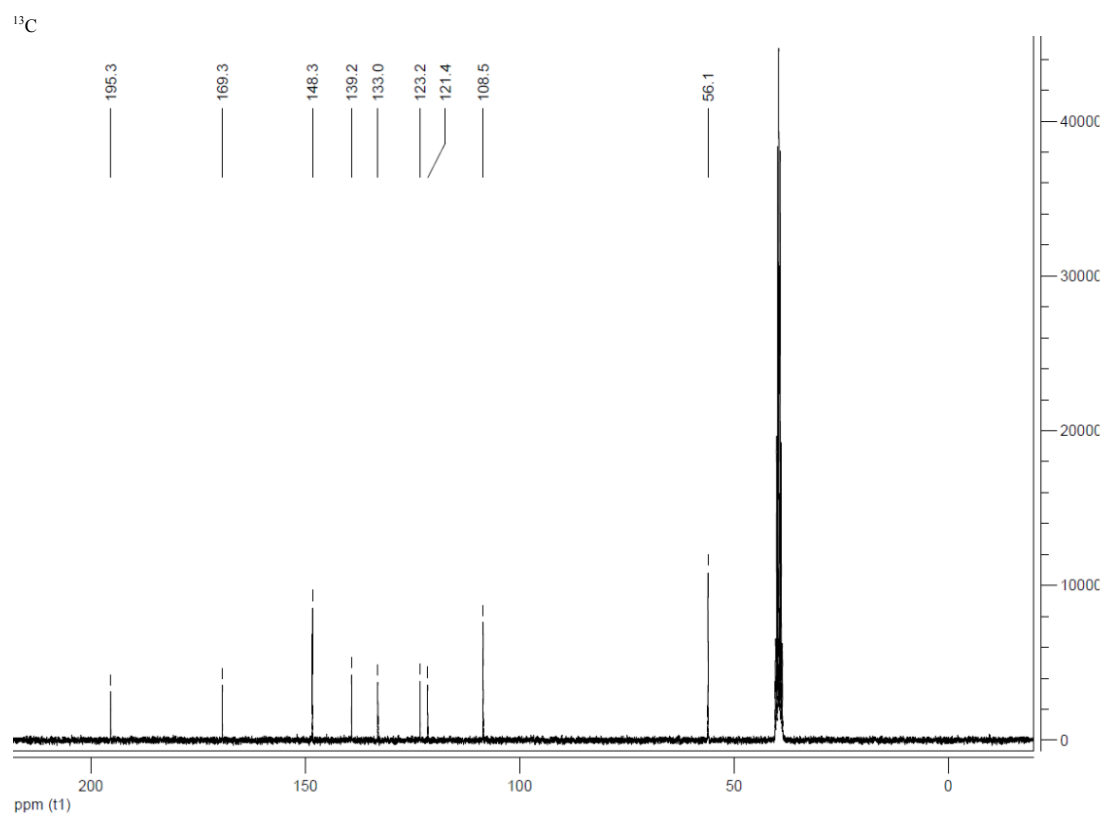

Supplement: c7sc01364g3.pdf [file c7sc01364g3.pdf]
